# Supplementary material for: A novel nanotube-shaped polypyrrole–Pd composite prepared using reverse microemulsion polymerization and its evaluation as an antibacterial agent
Source: Royal Society of Chemistry journal article supplement (doi:10.1039/c5nj00175g), 2015-01-01
Supplement: c5nj00175g1.pdf [file c5nj00175g1.pdf]

Electronic supplementary material (ESI)

This Journal is New Journal of chemistry 2015

## Supplemental Information

### Novel nanotube-shaped polypyrrole-Pd composite prepared using reverse microemulsion polymerization and its evaluation as an antibacterial agent

Alireza Salabat<sup>\*,a</sup>, Farid Mirhoseini<sup>a</sup>, Majid Mahdieh<sup>b</sup> and Hassan Saydi<sup>a</sup>

<sup>a</sup> Department of Chemistry, Faculty of Science, Arak University, 38156-8-8349, Arak, Iran

<sup>b</sup> Department of Biology, Faculty of Science, Arak University, 38156-8-8349, Arak, Iran

\* Correspondence to: A. Salabat, TEL: +98-86-34173400; Fax: +98-86-34173406;

E-mail address: [A-Salabat@araku.ac.ir](mailto:A-Salabat@araku.ac.ir)

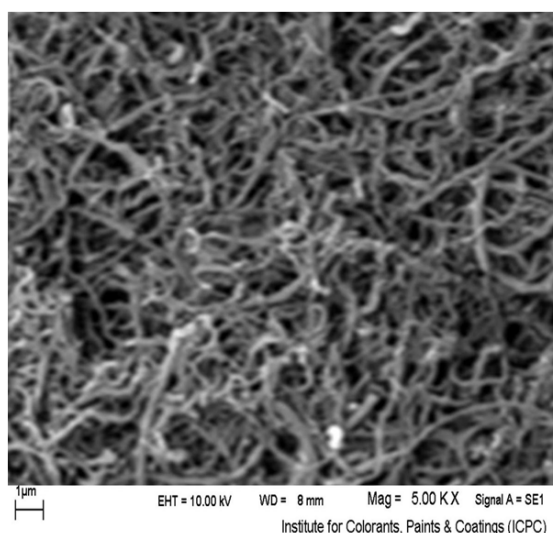

**Fig. S1.** SEM micrograph of PPy-Pd nanocomposite.

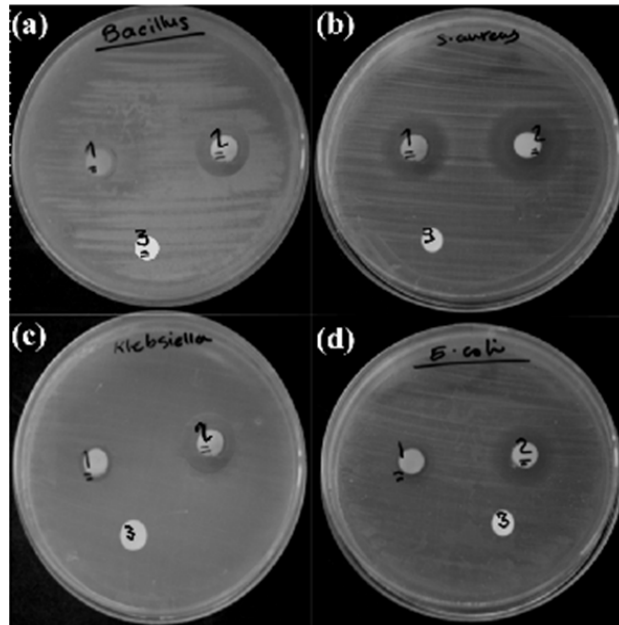

**Fig. S2.** Antibacterial activity of clinical strain of (a) *Bacillus*, (b) *Staphylococcus aureus*, (c) *Klebsiella* and (d) *Escherichia coli*, with (1) Pure PPy, (2) PPy-Pd composite and (3) Control, by Kirby-bauer method.
