# Supplementary figures and images for: A novel nanotube-shaped polypyrrole–Pd composite prepared using reverse microemulsion polymerization and its evaluation as an antibacterial agent
Source: Royal Society of Chemistry journal article supplement (doi:10.1039/c5nj00175g), 2015-01-01

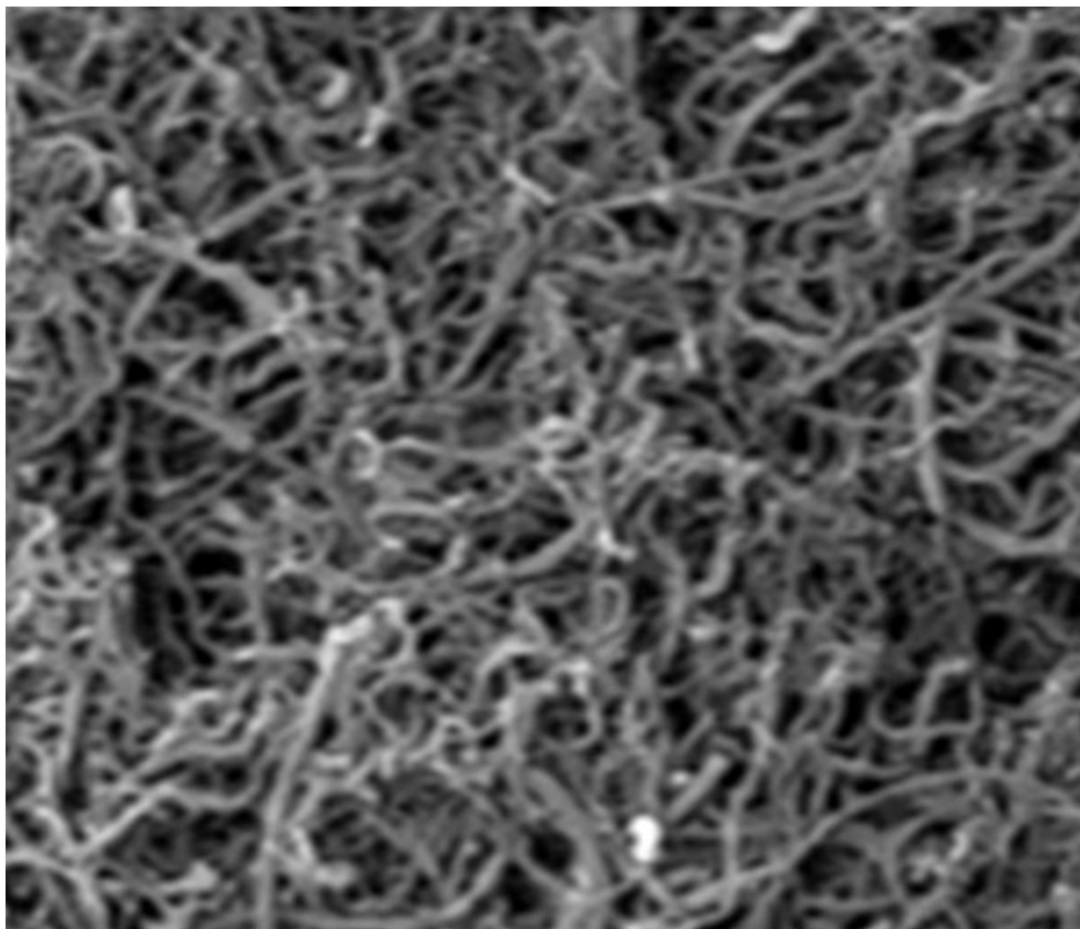

1  $\mu\text{m}$

EHT = 10.00 kV

WD = 8 mm

Mag = 5.00 KX

Signal A = SE1

Institute for Colorants, Paints & Coatings (ICPC)

**Fig. S1**

Supplement: c5nj00175g2.pdf [file c5nj00175g2.pdf]

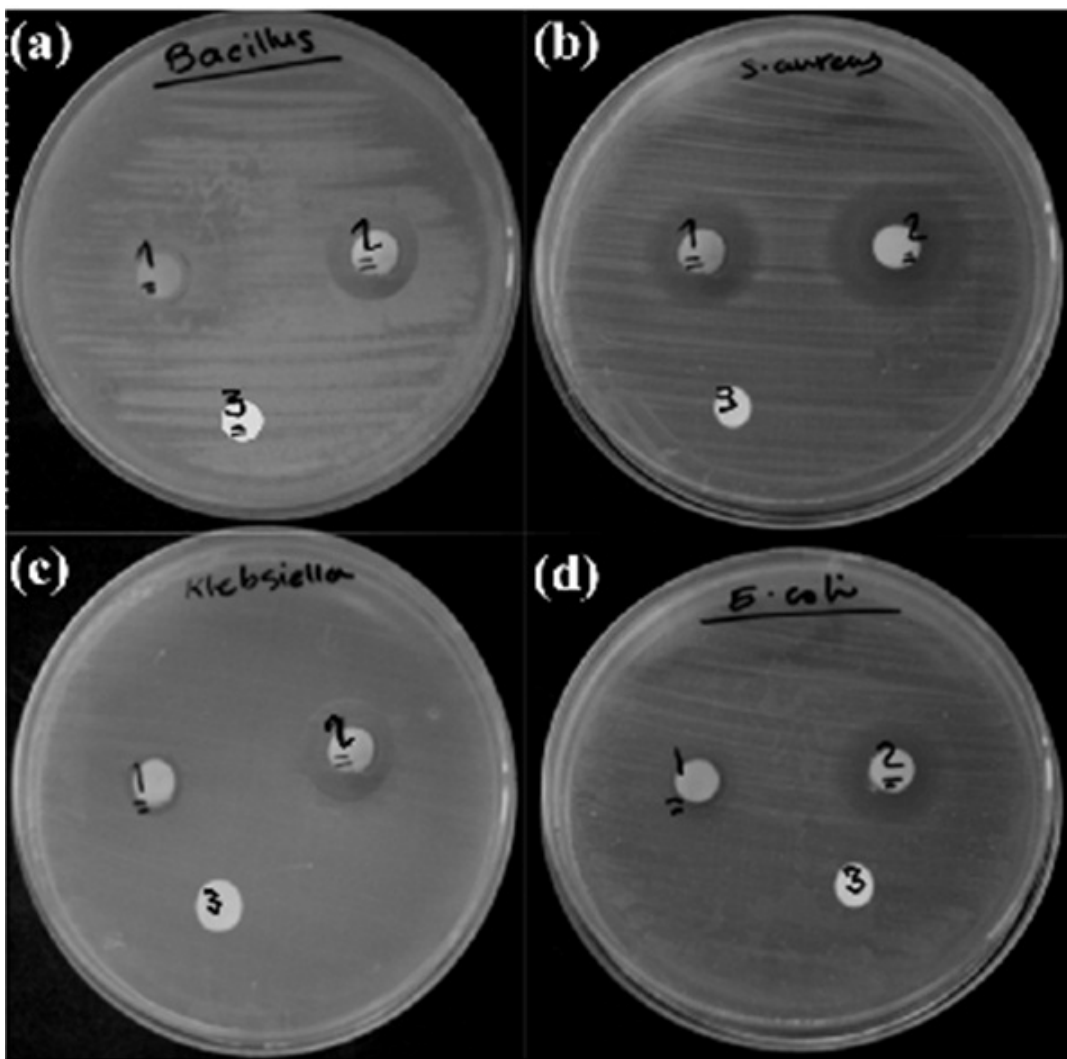

Fig. S2

Supplement: c5nj00175g3.pdf [file c5nj00175g3.pdf]
